# Supplementary material for: Prepregnancy body mass index and risk of preterm birth: association heterogeneity by preterm subgroups
Source: PubMed Central journal article supplement (PMC4022544; doi:10.1186/1471-2393-14-153), 2014-04-30
Supplement: 1471-2393-14-153-S1.pdf [file 1471-2393-14-153-S1.pdf]

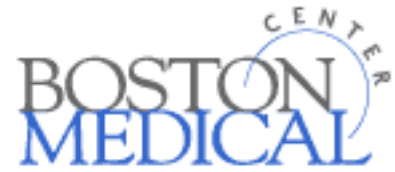

## Boston Medical Center

# MATERNAL POSTPARTUM QUESTIONNAIRE

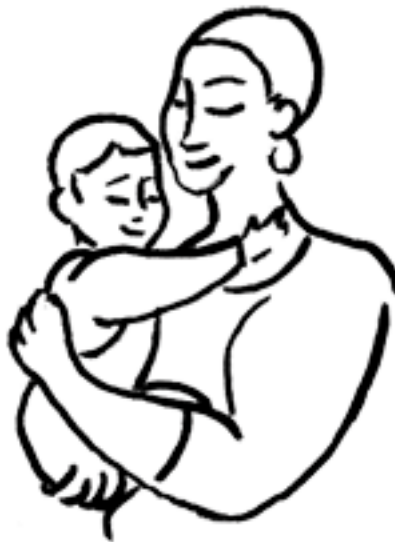

Study ID

|  |
|--|
|  |
|--|

Today's date   /   /

Interview is  Complete  Incomplete

Location of Interview

Interviewer's Name

If incomplete date of future visit   /   /

**Protocol #98 - 38****" Molecular Epidemiologic Study of Low Birth Weight "**

I attest that I have fully and appropriately informed this subject of the nature of the above research study and have offered to answer any question that she may have. This subject has agreed to participate in the study and signed the written informed consent form.

\_\_\_\_\_  
Signature of Principal Investigator/Designate

\_\_\_\_\_  
Date

**1. Interview conducted:**

- Alone    Friends in room    Father of baby in room    Interpreter in room

**Interviewers: please read the following statement to the subject before you begin interview. I WOULD LIKE TO REMIND YOU THAT YOU MAY SKIP ANY QUESTION YOU DO NOT WISH TO ANSWER. The following questions are about your general health before and during this pregnancy.**

**I. GENERAL HEALTH STATUS**

2. Your prepregnancy height  feet  inches ( or  cm )

3. Your prepregnant weight  lbs ( or  kg )

4. Your total weight gain during pregnancy  lbs ( or  kg )

5. Can I ask you about your child's biological father's height, weight, and age?  Yes    No

If NO, skip to question 6 below

5a. Baby's father's height  feet  inches ( or  cm )

5b. Baby's father's weight  lbs ( or  kg )

5c. Baby's father's age  years

**II. INFORMATION ABOUT THIS INDEX PREGNANCY**

6. Did you have a vaginal or C-Section delivery?  Vaginal    C/S

**When you came to the hospital, was your first sign of labor**

- Uterine CTX    ROM without CTX    Both CTX and ROM    None of the above

If "None of the above",

Was you labor induced by your doctor/midwife during this pregnancy?  Yes    No

7. Did you get any prenatal care from a doctor or nurse-midwife during this pregnancy?

Yes    No

If yes, then go to next questions, if NO, SKIP TO QUESTION 13

8. Where did you get your prenatal care?

- BMC--Women's Center    BMC--Doctor's Office Building    BMC--Adolescent Center    Other

If "Other", specify:

9. When did you find out you were pregnant?  wks gestation

10. How many weeks pregnant were you when you went for your first prenatal visit?  wks

11. How many prenatal appointments did you miss?   appointments

11a. How many prenatal appointments did you have?

less than 5  5 - 10  more than 10 visits

11b. How many prenatal ultrasounds did you have?

12. Did you have any flu during this pregnancy?  Yes  No

a. First trimester  Yes  No

b. Second trimester  Yes  No

c. Third trimester  Yes  No

13. Did you have any fever during this pregnancy?  Yes  No

a. First trimester  Yes  No

b. Second trimester  Yes  No

c. Third trimester  Yes  No

14. During this pregnancy, did you have any swelling, water retention, or edema?  Yes  No

a. Did your ankles swell?  Yes  No If yes, starting at   weeks

b. Did your legs swell?  Yes  No If yes, starting at   weeks

c. Did your hands swell?  Yes  No If yes, starting at   weeks

d. Did your face swell?  Yes  No If yes, starting at   weeks

15. Do you or have you ever had any history of asthma?

No  Only when I was a child, but outgrew now  Yes, I have it now

If yes, did you experience any asthma attacks during your pregnancy?  Yes  No

a. 1st trimester?  Yes  No If yes, how many times

b. 2nd trimester  Yes  No if yes, how many times

c. 3rd trimester  Yes  No if yes, how many times

16. Do you or have you ever had Eczema?

No  Only when I was a child, but outgrew now  Yes, I have it now

17. Do you or have you ever had hay fever or seasonal allergies?

No  Only when I was a child, but outgrew now  Yes, I have it now

18. Do you have any drug allergies?  Yes  No (please use "," to separate drugs)

If yes, specify the drug:

19. Do you or have you ever had food or environmental allergy? (If no, skip to section III)

No  Only when I was a child, but outgrew now  Yes, I have it now

If you ever had an allergy, what type of allergen are you allergic to?

19a. Cow's milk (including cheese and dairy products)  Yes  No

19b. Egg  Yes  No

19c. Peanut  Yes  No

19d. Walnut  Yes  No

19e. Sesame  Yes  No

19f. Shellfish  Yes  No

19g. Fish  Yes  No

19o. Others  Yes  No

19h. Soy  Yes  No

19i. Wheat  Yes  No

19j. Cat  Yes  No

19k. Dog  Yes  No

19l. Cockroach  Yes  No

19m. Dust Mites  Yes  No

19n. Molds  Yes  No

If Others, specify:







### III. Allergy related conditions in baby's father

20. Can I ask you some allergy related questions about your baby's father?  Yes  No

If NO, skip to question 26 (next page)

21. Does he or has he ever had Eczema?

No  Only when he was a child, but outgrew now  Yes, he has it now  Don't know

22. Does he or has he ever had any history of asthma?

No  Only when he was a child, but outgrew now  Yes, he has it now  Don't know

23. Does he or has he ever had hay fever or seasonal allergies?

No  Only when he was a child, but outgrew now  Yes, he has it now  Don't know

24. Does he or has he ever had any drug allergies?  Yes  No  Don't know

If yes, specify the drug:

(please use "," to separate drugs)

25. Does he or has he ever had any food or environmental allergies?

No  Only when he was a child, but outgrew now  Yes, he has it now  Don't know

If NO, skip to question 26 below

If he ever had a allergy, what type of allergen is he allergic to?

25a. Cow's milk (including cheese and diary products)  Yes  No

25b. Egg  Yes  No

25h. Soy  Yes  No

25c. Peanut  Yes  No

25i. Wheat  Yes  No

25d. Walnut  Yes  No

25j. Cat  Yes  No

25e. Sesame  Yes  No

25k. Dog  Yes  No

25f. Shellfish  Yes  No

25l. Cockroach  Yes  No

25g. Fish  Yes  No

25m. Dust Mites  Yes  No

25o. Others  Yes  No

25n. Molds  Yes  No

If Others, specify:

|  |  |  |
|--|--|--|
|  |  |  |
|  |  |  |

26. During this pregnancy, did you have any vaginal bleeding?  Yes  No

a. During first trimester  Yes  No

b. During second trimester  Yes  No

c. During third trimester  Yes  No

d. Preceding labor and delivery  Yes  No

**27. Did you have any vaginal or genital tract or urinary tract infections during pregnancy? (including yeast infections)**  Yes  No

**If YES: I'd like to ask you some questions about those infections. How many times did you have an infection? What kinds of infections were they?**

| Infection Details                                 | 1st Time                                                                                                                                                                                                                                                                                                                                                                                                     | 2nd Time                                                                                                                                                                                                                                                                                                                                                                                                     | 3rd Time                                                                                                                                                                                                                                                                                                                                                                                                     | 4th Time                                                                                                                                                                                                                                                                                                                                                                                                     |
|---------------------------------------------------|--------------------------------------------------------------------------------------------------------------------------------------------------------------------------------------------------------------------------------------------------------------------------------------------------------------------------------------------------------------------------------------------------------------|--------------------------------------------------------------------------------------------------------------------------------------------------------------------------------------------------------------------------------------------------------------------------------------------------------------------------------------------------------------------------------------------------------------|--------------------------------------------------------------------------------------------------------------------------------------------------------------------------------------------------------------------------------------------------------------------------------------------------------------------------------------------------------------------------------------------------------------|--------------------------------------------------------------------------------------------------------------------------------------------------------------------------------------------------------------------------------------------------------------------------------------------------------------------------------------------------------------------------------------------------------------|
| <b>a. Trimester</b>                               | <input type="radio"/> 1 <input type="radio"/> 2 <input type="radio"/> 3                                                                                                                                                                                                                                                                                                                                      | <input type="radio"/> 1 <input type="radio"/> 2 <input type="radio"/> 3                                                                                                                                                                                                                                                                                                                                      | <input type="radio"/> 1 <input type="radio"/> 2 <input type="radio"/> 3                                                                                                                                                                                                                                                                                                                                      | <input type="radio"/> 1 <input type="radio"/> 2 <input type="radio"/> 3                                                                                                                                                                                                                                                                                                                                      |
| <b>b. Type</b>                                    | <input type="radio"/> Chlamydia<br><input type="radio"/> Gonorrhea<br><input type="radio"/> Syphilis<br><input type="radio"/> Trichomonas<br><input type="radio"/> GBS<br><input type="radio"/> BV<br><input type="radio"/> Yeast<br><input type="radio"/> Herpes<br><input type="radio"/> HPV<br><input type="radio"/> Other GT<br><input type="radio"/> Unknown GTI<br><input type="radio"/> Urinary Tract | <input type="radio"/> Chlamydia<br><input type="radio"/> Gonorrhea<br><input type="radio"/> Syphilis<br><input type="radio"/> Trichomonas<br><input type="radio"/> GBS<br><input type="radio"/> BV<br><input type="radio"/> Yeast<br><input type="radio"/> Herpes<br><input type="radio"/> HPV<br><input type="radio"/> Other GT<br><input type="radio"/> Unknown GTI<br><input type="radio"/> Urinary Tract | <input type="radio"/> Chlamydia<br><input type="radio"/> Gonorrhea<br><input type="radio"/> Syphilis<br><input type="radio"/> Trichomonas<br><input type="radio"/> GBS<br><input type="radio"/> BV<br><input type="radio"/> Yeast<br><input type="radio"/> Herpes<br><input type="radio"/> HPV<br><input type="radio"/> Other GT<br><input type="radio"/> Unknown GTI<br><input type="radio"/> Urinary Tract | <input type="radio"/> Chlamydia<br><input type="radio"/> Gonorrhea<br><input type="radio"/> Syphilis<br><input type="radio"/> Trichomonas<br><input type="radio"/> GBS<br><input type="radio"/> BV<br><input type="radio"/> Yeast<br><input type="radio"/> Herpes<br><input type="radio"/> HPV<br><input type="radio"/> Other GT<br><input type="radio"/> Unknown GTI<br><input type="radio"/> Urinary Tract |
| <b>c. Specify Other GT</b>                        | <input type="text"/>                                                                                                                                                                                                                                                                                                                                                                                         | <input type="text"/>                                                                                                                                                                                                                                                                                                                                                                                         | <input type="text"/>                                                                                                                                                                                                                                                                                                                                                                                         | <input type="text"/>                                                                                                                                                                                                                                                                                                                                                                                         |
| <b>d. What was the treatment you received?</b>    | <input type="radio"/> None<br><input type="radio"/> Pill<br><input type="radio"/> Shot<br><input type="radio"/> Cream<br><input type="radio"/> Other                                                                                                                                                                                                                                                         | <input type="radio"/> None<br><input type="radio"/> Pill<br><input type="radio"/> Shot<br><input type="radio"/> Cream<br><input type="radio"/> Other                                                                                                                                                                                                                                                         | <input type="radio"/> None<br><input type="radio"/> Pill<br><input type="radio"/> Shot<br><input type="radio"/> Cream<br><input type="radio"/> Other                                                                                                                                                                                                                                                         | <input type="radio"/> None<br><input type="radio"/> Pill<br><input type="radio"/> Shot<br><input type="radio"/> Cream<br><input type="radio"/> Other                                                                                                                                                                                                                                                         |
| <b>e. How much of the treatment did you take?</b> | <input type="radio"/> None<br><input type="radio"/> Some<br><input type="radio"/> All                                                                                                                                                                                                                                                                                                                        | <input type="radio"/> None<br><input type="radio"/> Some<br><input type="radio"/> All                                                                                                                                                                                                                                                                                                                        | <input type="radio"/> None<br><input type="radio"/> Some<br><input type="radio"/> All                                                                                                                                                                                                                                                                                                                        | <input type="radio"/> None<br><input type="radio"/> Some<br><input type="radio"/> All                                                                                                                                                                                                                                                                                                                        |
| <b>f. Specify Other treatment</b>                 | <input type="text"/>                                                                                                                                                                                                                                                                                                                                                                                         | <input type="text"/>                                                                                                                                                                                                                                                                                                                                                                                         | <input type="text"/>                                                                                                                                                                                                                                                                                                                                                                                         | <input type="text"/>                                                                                                                                                                                                                                                                                                                                                                                         |

**28. Thinking back, just before you became pregnant, did you want to become pregnant at that time?**  
 Yes  No

**IF NO: 28a. Do you want to become pregnant in the future?**  Yes  No

**29. How would you characterize the amount of stress in your life in general?**

Not stressful  Average  Very Stressful

**30. How would you characterize the amount of stress in your life during this pregnancy?**

Not stressful  Average  Very Stressful

**31. In the last month, how often have you felt that you were unable to control the important things in your life?**

Never  Almost never  Sometimes  Fairly often  Very often

**32. In the last month, how often have you felt confident about your ability to handle your personal problems?**

Never  Almost never  Sometimes  Fairly often  Very often

**33. In the last month, how often have you felt that things were going your way?**

Never  Almost never  Sometimes  Fairly often  Very often

**34. In the last month, how often have you felt difficulties were piling up so high that you could not overcome them?**

Never  Almost never  Sometimes  Fairly often  Very often



35. Did you experience any major stressful events, such as lost family members, divorce, lost job, severe illness/injuries of family member, etc? Mark for each time period.  Yes  No

a. Prepregnancy(within 1 year of conception)  Yes  No Specify:

b. 1st Trimester  Yes  No

Specify:

c. 2nd Trimester  Yes  No

Specify:

d. 3rd Trimester  Yes  No

Specify:

36. Did you witness any violence during your pregnancy?  Yes  No

IF YES, Specify:

36a. If YES, was it:  Inside your home  Outside your home  Both

37. How would you describe the amount of involvement there was during your pregnancy from the father of your baby? Would you say he was:

Not involved  A little involved  Mostly involved  Very involved

38. How would you rate the amount of social support you received from the father of your baby during your pregnancy?

None  A little  A good amount  An excellent amount

39. How would you rate the amount of social support you received during your pregnancy from your other family members and your friends?

None  A little  A good amount  An excellent amount

## IV. REPRODUCTIVE HISTORY

40. How old were you when you had your 1st period?  years

a. Does your menstrual period come each month?  Yes  No

b. Does your menstrual period come around the same time (+/- 7 d of LMP)?  Yes  No

c. What is your average cycle length in days, that is how many days are there from one period to the next?  days

d. How long does each period's bleeding last?  days

41. Do you have pelvic or abdominal pain during your menstrual period?

No  Occasionally  Almost all the time

42a. If "Occasionally" or "Almost all the time": Do you rate your menstrual pain as:

Mild  Moderate  Severe (could not go to school or work)

42. Prior to this pregnancy, what kind of birth control were you using? (check all that apply)

- None
- Abstinence during fertile days ( eg. Natural family planning)
- Birth Control Pills
- Cervical Cap
- Condoms
- Creams
- Hormone Shots
- IUD
- Patch
- Withdrawel
- Other

If "Other", Specify:

43. How many times have you been pregnant (including miscarriage, abortion, stillbirth) ?  X's

What were the results of those pregnancies? (NOT including the index baby)

**1st Pregnancy**

**2nd Pregnancy**

**3rd Pregnancy**

a. On what date did the pregnancy end?

<sup>M</sup> /  <sup>D</sup> /  <sup>Y</sup>

<sup>M</sup> /  <sup>D</sup> /  <sup>Y</sup>

<sup>M</sup> /  <sup>D</sup> /  <sup>Y</sup>

b. How many weeks did the pregnancy last?

c. How did the pregnancy end?

- Live birth
- Still birth
- Miscarriage
- Abortion
- Ectopic pregnancy
- Moles

- Live birth
- Still birth
- Miscarriage
- Abortion
- Ectopic pregnancy
- Moles

- Live birth
- Still birth
- Miscarriage
- Abortion
- Ectopic pregnancy
- Moles

d. Pregnancy complications?

- None
- Mild Preeclampsia
- Severe Preeclampsia
- Eclampsia
- Abruptio placentae
- Placenta previa
- Incompetent cervix
- Gestational diabetes
- Intrauterine infection
- Others

- None
- Mild Preeclampsia
- Severe Preeclampsia
- Eclampsia
- Abruptio placentae
- Placenta previa
- Incompetent cervix
- Gestational diabetes
- Intrauterine infection
- Others

- None
- Mild Preeclampsia
- Severe Preeclampsia
- Eclampsia
- Abruptio placentae
- Placenta previa
- Incompetent cervix
- Gestational diabetes
- Intrauterine infection
- Others

If this was a live birth, complete the following questions

E. Sex of the baby

- Male  Female

- Male  Female

- Male  Female

f. Type of Delivery

- Vaginal  C-section

- Vaginal  C-section

- Vaginal  C-section

g. Birthweight of the baby

lb  oz

lb  oz

lb  oz

h. Any Birth Defects

**43. Continued I**

**4th Pregnancy**

**5th Pregnancy**

**6th Pregnancy**

**a. On what date did the pregnancy end?**

M / D / Y  
  /   /

M / D / Y  
  /   /

M / D / Y  
  /   /

**b. How many weeks did the pregnancy last?**

**c. How did the pregnancy end?**

- Live birth
- Still birth
- Miscarriage
- Abortion
- Ectopic pregnancy
- Moles

- Live birth
- Still birth
- Miscarriage
- Abortion
- Ectopic pregnancy
- Moles

- Live birth
- Still birth
- Miscarriage
- Abortion
- Ectopic pregnancy
- Moles

**d. Pregnancy complications?**

- None
- Mild Preeclampsia
- Severe Preeclampsia
- Eclampsia
- Abruptio placentae
- Placenta previa
- Incompetent cervix
- Gestational diabetes
- Intrauterine infection
- Others

- None
- Mild Preeclampsia
- Severe Preeclampsia
- Eclampsia
- Abruptio placentae
- Placenta previa
- Incompetent cervix
- Gestational diabetes
- Intrauterine infection
- Others

- None
- Mild Preeclampsia
- Severe Preeclampsia
- Eclampsia
- Abruptio placentae
- Placenta previa
- Incompetent cervix
- Gestational diabetes
- Intrauterine infection
- Others

**If this was a live birth, complete the following questions**

**E. Sex of the baby**

- Male  Female

- Male  Female

- Male  Female

**f. Type of Delivery**

- Vaginal  C-section

- Vaginal  C-section

- Vaginal  C-section

**g. Birthweight of the baby**

lb   oz

lb   oz

lb   oz

**h. Any Birth Defects**

43. Continued II

|                                                  | 7th Pregnancy                                                                                                                                                                                                                                                                                                                                                                                                                                                                                                                                                                                                                                                                                                                                                                                                                                                                                                                  | 8th Pregnancy                                                                                                                                                                                                                                                                                                                                                                                                                                                                 | 9th Pregnancy                                                                                                                                                                                                                                                                                                                                                                                                                                                                 |                                                                                                                                                                |   |   |                                                                                                                                                                |   |   |   |  |  |  |  |  |  |  |  |  |  |  |  |  |                                                                                                                                                                                                                                                                                                                                                                                                                                                                                                                                                                                                                                                                                                                                                                                                                                                                                                                                |   |  |  |   |   |  |  |   |   |  |  |  |  |  |  |  |  |  |  |  |  |  |                                                                                                                                                                                                                                                                                                                                                                                                                                                                                                                                                                                                                                                                                                                                                                                                                                                                                                                                |   |  |  |   |   |  |  |   |   |  |  |  |  |  |  |  |  |  |  |  |  |  |
|--------------------------------------------------|--------------------------------------------------------------------------------------------------------------------------------------------------------------------------------------------------------------------------------------------------------------------------------------------------------------------------------------------------------------------------------------------------------------------------------------------------------------------------------------------------------------------------------------------------------------------------------------------------------------------------------------------------------------------------------------------------------------------------------------------------------------------------------------------------------------------------------------------------------------------------------------------------------------------------------|-------------------------------------------------------------------------------------------------------------------------------------------------------------------------------------------------------------------------------------------------------------------------------------------------------------------------------------------------------------------------------------------------------------------------------------------------------------------------------|-------------------------------------------------------------------------------------------------------------------------------------------------------------------------------------------------------------------------------------------------------------------------------------------------------------------------------------------------------------------------------------------------------------------------------------------------------------------------------|----------------------------------------------------------------------------------------------------------------------------------------------------------------|---|---|----------------------------------------------------------------------------------------------------------------------------------------------------------------|---|---|---|--|--|--|--|--|--|--|--|--|--|--|--|--|--------------------------------------------------------------------------------------------------------------------------------------------------------------------------------------------------------------------------------------------------------------------------------------------------------------------------------------------------------------------------------------------------------------------------------------------------------------------------------------------------------------------------------------------------------------------------------------------------------------------------------------------------------------------------------------------------------------------------------------------------------------------------------------------------------------------------------------------------------------------------------------------------------------------------------|---|--|--|---|---|--|--|---|---|--|--|--|--|--|--|--|--|--|--|--|--|--|--------------------------------------------------------------------------------------------------------------------------------------------------------------------------------------------------------------------------------------------------------------------------------------------------------------------------------------------------------------------------------------------------------------------------------------------------------------------------------------------------------------------------------------------------------------------------------------------------------------------------------------------------------------------------------------------------------------------------------------------------------------------------------------------------------------------------------------------------------------------------------------------------------------------------------|---|--|--|---|---|--|--|---|---|--|--|--|--|--|--|--|--|--|--|--|--|--|
| <b>a. On what date did the pregnancy end?</b>    | <table border="1" style="display: inline-table; border-collapse: collapse;"> <tr> <td style="width: 20px; text-align: center;">M</td> <td style="width: 20px;"></td> <td style="width: 20px;"></td> <td style="width: 20px; text-align: center;">/</td> <td style="width: 20px; text-align: center;">D</td> <td style="width: 20px;"></td> <td style="width: 20px;"></td> <td style="width: 20px; text-align: center;">/</td> <td style="width: 20px; text-align: center;">Y</td> <td style="width: 20px;"></td> <td style="width: 20px;"></td> </tr> <tr> <td style="width: 20px;"></td> </tr> </table> | M                                                                                                                                                                                                                                                                                                                                                                                                                                                                             |                                                                                                                                                                                                                                                                                                                                                                                                                                                                               |                                                                                                                                                                | / | D |                                                                                                                                                                |   | / | Y |  |  |  |  |  |  |  |  |  |  |  |  |  | <table border="1" style="display: inline-table; border-collapse: collapse;"> <tr> <td style="width: 20px; text-align: center;">M</td> <td style="width: 20px;"></td> <td style="width: 20px;"></td> <td style="width: 20px; text-align: center;">/</td> <td style="width: 20px; text-align: center;">D</td> <td style="width: 20px;"></td> <td style="width: 20px;"></td> <td style="width: 20px; text-align: center;">/</td> <td style="width: 20px; text-align: center;">Y</td> <td style="width: 20px;"></td> <td style="width: 20px;"></td> </tr> <tr> <td style="width: 20px;"></td> </tr> </table> | M |  |  | / | D |  |  | / | Y |  |  |  |  |  |  |  |  |  |  |  |  |  | <table border="1" style="display: inline-table; border-collapse: collapse;"> <tr> <td style="width: 20px; text-align: center;">M</td> <td style="width: 20px;"></td> <td style="width: 20px;"></td> <td style="width: 20px; text-align: center;">/</td> <td style="width: 20px; text-align: center;">D</td> <td style="width: 20px;"></td> <td style="width: 20px;"></td> <td style="width: 20px; text-align: center;">/</td> <td style="width: 20px; text-align: center;">Y</td> <td style="width: 20px;"></td> <td style="width: 20px;"></td> </tr> <tr> <td style="width: 20px;"></td> </tr> </table> | M |  |  | / | D |  |  | / | Y |  |  |  |  |  |  |  |  |  |  |  |  |  |
| M                                                |                                                                                                                                                                                                                                                                                                                                                                                                                                                                                                                                                                                                                                                                                                                                                                                                                                                                                                                                |                                                                                                                                                                                                                                                                                                                                                                                                                                                                               | /                                                                                                                                                                                                                                                                                                                                                                                                                                                                             | D                                                                                                                                                              |   |   | /                                                                                                                                                              | Y |   |   |  |  |  |  |  |  |  |  |  |  |  |  |  |                                                                                                                                                                                                                                                                                                                                                                                                                                                                                                                                                                                                                                                                                                                                                                                                                                                                                                                                |   |  |  |   |   |  |  |   |   |  |  |  |  |  |  |  |  |  |  |  |  |  |                                                                                                                                                                                                                                                                                                                                                                                                                                                                                                                                                                                                                                                                                                                                                                                                                                                                                                                                |   |  |  |   |   |  |  |   |   |  |  |  |  |  |  |  |  |  |  |  |  |  |
|                                                  |                                                                                                                                                                                                                                                                                                                                                                                                                                                                                                                                                                                                                                                                                                                                                                                                                                                                                                                                |                                                                                                                                                                                                                                                                                                                                                                                                                                                                               |                                                                                                                                                                                                                                                                                                                                                                                                                                                                               |                                                                                                                                                                |   |   |                                                                                                                                                                |   |   |   |  |  |  |  |  |  |  |  |  |  |  |  |  |                                                                                                                                                                                                                                                                                                                                                                                                                                                                                                                                                                                                                                                                                                                                                                                                                                                                                                                                |   |  |  |   |   |  |  |   |   |  |  |  |  |  |  |  |  |  |  |  |  |  |                                                                                                                                                                                                                                                                                                                                                                                                                                                                                                                                                                                                                                                                                                                                                                                                                                                                                                                                |   |  |  |   |   |  |  |   |   |  |  |  |  |  |  |  |  |  |  |  |  |  |
| M                                                |                                                                                                                                                                                                                                                                                                                                                                                                                                                                                                                                                                                                                                                                                                                                                                                                                                                                                                                                |                                                                                                                                                                                                                                                                                                                                                                                                                                                                               | /                                                                                                                                                                                                                                                                                                                                                                                                                                                                             | D                                                                                                                                                              |   |   | /                                                                                                                                                              | Y |   |   |  |  |  |  |  |  |  |  |  |  |  |  |  |                                                                                                                                                                                                                                                                                                                                                                                                                                                                                                                                                                                                                                                                                                                                                                                                                                                                                                                                |   |  |  |   |   |  |  |   |   |  |  |  |  |  |  |  |  |  |  |  |  |  |                                                                                                                                                                                                                                                                                                                                                                                                                                                                                                                                                                                                                                                                                                                                                                                                                                                                                                                                |   |  |  |   |   |  |  |   |   |  |  |  |  |  |  |  |  |  |  |  |  |  |
|                                                  |                                                                                                                                                                                                                                                                                                                                                                                                                                                                                                                                                                                                                                                                                                                                                                                                                                                                                                                                |                                                                                                                                                                                                                                                                                                                                                                                                                                                                               |                                                                                                                                                                                                                                                                                                                                                                                                                                                                               |                                                                                                                                                                |   |   |                                                                                                                                                                |   |   |   |  |  |  |  |  |  |  |  |  |  |  |  |  |                                                                                                                                                                                                                                                                                                                                                                                                                                                                                                                                                                                                                                                                                                                                                                                                                                                                                                                                |   |  |  |   |   |  |  |   |   |  |  |  |  |  |  |  |  |  |  |  |  |  |                                                                                                                                                                                                                                                                                                                                                                                                                                                                                                                                                                                                                                                                                                                                                                                                                                                                                                                                |   |  |  |   |   |  |  |   |   |  |  |  |  |  |  |  |  |  |  |  |  |  |
| M                                                |                                                                                                                                                                                                                                                                                                                                                                                                                                                                                                                                                                                                                                                                                                                                                                                                                                                                                                                                |                                                                                                                                                                                                                                                                                                                                                                                                                                                                               | /                                                                                                                                                                                                                                                                                                                                                                                                                                                                             | D                                                                                                                                                              |   |   | /                                                                                                                                                              | Y |   |   |  |  |  |  |  |  |  |  |  |  |  |  |  |                                                                                                                                                                                                                                                                                                                                                                                                                                                                                                                                                                                                                                                                                                                                                                                                                                                                                                                                |   |  |  |   |   |  |  |   |   |  |  |  |  |  |  |  |  |  |  |  |  |  |                                                                                                                                                                                                                                                                                                                                                                                                                                                                                                                                                                                                                                                                                                                                                                                                                                                                                                                                |   |  |  |   |   |  |  |   |   |  |  |  |  |  |  |  |  |  |  |  |  |  |
|                                                  |                                                                                                                                                                                                                                                                                                                                                                                                                                                                                                                                                                                                                                                                                                                                                                                                                                                                                                                                |                                                                                                                                                                                                                                                                                                                                                                                                                                                                               |                                                                                                                                                                                                                                                                                                                                                                                                                                                                               |                                                                                                                                                                |   |   |                                                                                                                                                                |   |   |   |  |  |  |  |  |  |  |  |  |  |  |  |  |                                                                                                                                                                                                                                                                                                                                                                                                                                                                                                                                                                                                                                                                                                                                                                                                                                                                                                                                |   |  |  |   |   |  |  |   |   |  |  |  |  |  |  |  |  |  |  |  |  |  |                                                                                                                                                                                                                                                                                                                                                                                                                                                                                                                                                                                                                                                                                                                                                                                                                                                                                                                                |   |  |  |   |   |  |  |   |   |  |  |  |  |  |  |  |  |  |  |  |  |  |
| <b>b. How many weeks did the pregnancy last?</b> | <table border="1" style="display: inline-table; border-collapse: collapse;"> <tr> <td style="width: 20px;"></td> <td style="width: 20px;"></td> </tr> </table>                                                                                                                                                                                                                                                                                                                                                                                                                                                                                                                                                                                                                                                                                                                                                                 |                                                                                                                                                                                                                                                                                                                                                                                                                                                                               |                                                                                                                                                                                                                                                                                                                                                                                                                                                                               | <table border="1" style="display: inline-table; border-collapse: collapse;"> <tr> <td style="width: 20px;"></td> <td style="width: 20px;"></td> </tr> </table> |   |   | <table border="1" style="display: inline-table; border-collapse: collapse;"> <tr> <td style="width: 20px;"></td> <td style="width: 20px;"></td> </tr> </table> |   |   |   |  |  |  |  |  |  |  |  |  |  |  |  |  |                                                                                                                                                                                                                                                                                                                                                                                                                                                                                                                                                                                                                                                                                                                                                                                                                                                                                                                                |   |  |  |   |   |  |  |   |   |  |  |  |  |  |  |  |  |  |  |  |  |  |                                                                                                                                                                                                                                                                                                                                                                                                                                                                                                                                                                                                                                                                                                                                                                                                                                                                                                                                |   |  |  |   |   |  |  |   |   |  |  |  |  |  |  |  |  |  |  |  |  |  |
|                                                  |                                                                                                                                                                                                                                                                                                                                                                                                                                                                                                                                                                                                                                                                                                                                                                                                                                                                                                                                |                                                                                                                                                                                                                                                                                                                                                                                                                                                                               |                                                                                                                                                                                                                                                                                                                                                                                                                                                                               |                                                                                                                                                                |   |   |                                                                                                                                                                |   |   |   |  |  |  |  |  |  |  |  |  |  |  |  |  |                                                                                                                                                                                                                                                                                                                                                                                                                                                                                                                                                                                                                                                                                                                                                                                                                                                                                                                                |   |  |  |   |   |  |  |   |   |  |  |  |  |  |  |  |  |  |  |  |  |  |                                                                                                                                                                                                                                                                                                                                                                                                                                                                                                                                                                                                                                                                                                                                                                                                                                                                                                                                |   |  |  |   |   |  |  |   |   |  |  |  |  |  |  |  |  |  |  |  |  |  |
|                                                  |                                                                                                                                                                                                                                                                                                                                                                                                                                                                                                                                                                                                                                                                                                                                                                                                                                                                                                                                |                                                                                                                                                                                                                                                                                                                                                                                                                                                                               |                                                                                                                                                                                                                                                                                                                                                                                                                                                                               |                                                                                                                                                                |   |   |                                                                                                                                                                |   |   |   |  |  |  |  |  |  |  |  |  |  |  |  |  |                                                                                                                                                                                                                                                                                                                                                                                                                                                                                                                                                                                                                                                                                                                                                                                                                                                                                                                                |   |  |  |   |   |  |  |   |   |  |  |  |  |  |  |  |  |  |  |  |  |  |                                                                                                                                                                                                                                                                                                                                                                                                                                                                                                                                                                                                                                                                                                                                                                                                                                                                                                                                |   |  |  |   |   |  |  |   |   |  |  |  |  |  |  |  |  |  |  |  |  |  |
|                                                  |                                                                                                                                                                                                                                                                                                                                                                                                                                                                                                                                                                                                                                                                                                                                                                                                                                                                                                                                |                                                                                                                                                                                                                                                                                                                                                                                                                                                                               |                                                                                                                                                                                                                                                                                                                                                                                                                                                                               |                                                                                                                                                                |   |   |                                                                                                                                                                |   |   |   |  |  |  |  |  |  |  |  |  |  |  |  |  |                                                                                                                                                                                                                                                                                                                                                                                                                                                                                                                                                                                                                                                                                                                                                                                                                                                                                                                                |   |  |  |   |   |  |  |   |   |  |  |  |  |  |  |  |  |  |  |  |  |  |                                                                                                                                                                                                                                                                                                                                                                                                                                                                                                                                                                                                                                                                                                                                                                                                                                                                                                                                |   |  |  |   |   |  |  |   |   |  |  |  |  |  |  |  |  |  |  |  |  |  |
| <b>c. How did the pregnancy end?</b>             | <input type="radio"/> Live birth<br><input type="radio"/> Still birth<br><input type="radio"/> Miscarriage<br><input type="radio"/> Abortion<br><input type="radio"/> Ectopic pregnancy<br><input type="radio"/> Moles                                                                                                                                                                                                                                                                                                                                                                                                                                                                                                                                                                                                                                                                                                         | <input type="radio"/> Live birth<br><input type="radio"/> Still birth<br><input type="radio"/> Miscarriage<br><input type="radio"/> Abortion<br><input type="radio"/> Ectopic pregnancy<br><input type="radio"/> Moles                                                                                                                                                                                                                                                        | <input type="radio"/> Live birth<br><input type="radio"/> Still birth<br><input type="radio"/> Miscarriage<br><input type="radio"/> Abortion<br><input type="radio"/> Ectopic pregnancy<br><input type="radio"/> Moles                                                                                                                                                                                                                                                        |                                                                                                                                                                |   |   |                                                                                                                                                                |   |   |   |  |  |  |  |  |  |  |  |  |  |  |  |  |                                                                                                                                                                                                                                                                                                                                                                                                                                                                                                                                                                                                                                                                                                                                                                                                                                                                                                                                |   |  |  |   |   |  |  |   |   |  |  |  |  |  |  |  |  |  |  |  |  |  |                                                                                                                                                                                                                                                                                                                                                                                                                                                                                                                                                                                                                                                                                                                                                                                                                                                                                                                                |   |  |  |   |   |  |  |   |   |  |  |  |  |  |  |  |  |  |  |  |  |  |
| <b>d. Pregnancy complications?</b>               | <input type="radio"/> None<br><input type="radio"/> Mild Preeclampsia<br><input type="radio"/> Severe Preeclampsia<br><input type="radio"/> Eclampsia<br><input type="radio"/> Abruptio placentae<br><input type="radio"/> Placenta previa<br><input type="radio"/> Incompetent cervix<br><input type="radio"/> Gestational diabetes<br><input type="radio"/> Intrauterine infection<br><input type="radio"/> Others <input style="width: 150px; height: 15px;" type="text"/>                                                                                                                                                                                                                                                                                                                                                                                                                                                  | <input type="radio"/> None<br><input type="radio"/> Mild Preeclampsia<br><input type="radio"/> Severe Preeclampsia<br><input type="radio"/> Eclampsia<br><input type="radio"/> Abruptio placentae<br><input type="radio"/> Placenta previa<br><input type="radio"/> Incompetent cervix<br><input type="radio"/> Gestational diabetes<br><input type="radio"/> Intrauterine infection<br><input type="radio"/> Others <input style="width: 150px; height: 15px;" type="text"/> | <input type="radio"/> None<br><input type="radio"/> Mild Preeclampsia<br><input type="radio"/> Severe Preeclampsia<br><input type="radio"/> Eclampsia<br><input type="radio"/> Abruptio placentae<br><input type="radio"/> Placenta previa<br><input type="radio"/> Incompetent cervix<br><input type="radio"/> Gestational diabetes<br><input type="radio"/> Intrauterine infection<br><input type="radio"/> Others <input style="width: 150px; height: 15px;" type="text"/> |                                                                                                                                                                |   |   |                                                                                                                                                                |   |   |   |  |  |  |  |  |  |  |  |  |  |  |  |  |                                                                                                                                                                                                                                                                                                                                                                                                                                                                                                                                                                                                                                                                                                                                                                                                                                                                                                                                |   |  |  |   |   |  |  |   |   |  |  |  |  |  |  |  |  |  |  |  |  |  |                                                                                                                                                                                                                                                                                                                                                                                                                                                                                                                                                                                                                                                                                                                                                                                                                                                                                                                                |   |  |  |   |   |  |  |   |   |  |  |  |  |  |  |  |  |  |  |  |  |  |

If this was a live birth, complete the following questions

|                                   |                                                                                                                                                                                                                                                                                                                                        |                                                               |                                                               |    |    |  |    |                                                                                                                                                                                                                                                                                                                                        |  |  |    |  |  |    |                                                                                                                                                                                                                                                                                                                                        |  |  |    |  |  |    |
|-----------------------------------|----------------------------------------------------------------------------------------------------------------------------------------------------------------------------------------------------------------------------------------------------------------------------------------------------------------------------------------|---------------------------------------------------------------|---------------------------------------------------------------|----|----|--|----|----------------------------------------------------------------------------------------------------------------------------------------------------------------------------------------------------------------------------------------------------------------------------------------------------------------------------------------|--|--|----|--|--|----|----------------------------------------------------------------------------------------------------------------------------------------------------------------------------------------------------------------------------------------------------------------------------------------------------------------------------------------|--|--|----|--|--|----|
| <b>E. Sex of the baby</b>         | <input type="radio"/> Male <input type="radio"/> Female                                                                                                                                                                                                                                                                                | <input type="radio"/> Male <input type="radio"/> Female       | <input type="radio"/> Male <input type="radio"/> Female       |    |    |  |    |                                                                                                                                                                                                                                                                                                                                        |  |  |    |  |  |    |                                                                                                                                                                                                                                                                                                                                        |  |  |    |  |  |    |
| <b>f. Type of Delivery</b>        | <input type="radio"/> Vaginal <input type="radio"/> C-section                                                                                                                                                                                                                                                                          | <input type="radio"/> Vaginal <input type="radio"/> C-section | <input type="radio"/> Vaginal <input type="radio"/> C-section |    |    |  |    |                                                                                                                                                                                                                                                                                                                                        |  |  |    |  |  |    |                                                                                                                                                                                                                                                                                                                                        |  |  |    |  |  |    |
| <b>g. Birthweight of the baby</b> | <table border="1" style="display: inline-table; border-collapse: collapse;"> <tr> <td style="width: 20px;"></td> <td style="width: 20px;"></td> <td style="width: 20px; text-align: center;">lb</td> <td style="width: 20px;"></td> <td style="width: 20px;"></td> <td style="width: 20px; text-align: center;">oz</td> </tr> </table> |                                                               |                                                               | lb |    |  | oz | <table border="1" style="display: inline-table; border-collapse: collapse;"> <tr> <td style="width: 20px;"></td> <td style="width: 20px;"></td> <td style="width: 20px; text-align: center;">lb</td> <td style="width: 20px;"></td> <td style="width: 20px;"></td> <td style="width: 20px; text-align: center;">oz</td> </tr> </table> |  |  | lb |  |  | oz | <table border="1" style="display: inline-table; border-collapse: collapse;"> <tr> <td style="width: 20px;"></td> <td style="width: 20px;"></td> <td style="width: 20px; text-align: center;">lb</td> <td style="width: 20px;"></td> <td style="width: 20px;"></td> <td style="width: 20px; text-align: center;">oz</td> </tr> </table> |  |  | lb |  |  | oz |
|                                   |                                                                                                                                                                                                                                                                                                                                        | lb                                                            |                                                               |    | oz |  |    |                                                                                                                                                                                                                                                                                                                                        |  |  |    |  |  |    |                                                                                                                                                                                                                                                                                                                                        |  |  |    |  |  |    |
|                                   |                                                                                                                                                                                                                                                                                                                                        | lb                                                            |                                                               |    | oz |  |    |                                                                                                                                                                                                                                                                                                                                        |  |  |    |  |  |    |                                                                                                                                                                                                                                                                                                                                        |  |  |    |  |  |    |
|                                   |                                                                                                                                                                                                                                                                                                                                        | lb                                                            |                                                               |    | oz |  |    |                                                                                                                                                                                                                                                                                                                                        |  |  |    |  |  |    |                                                                                                                                                                                                                                                                                                                                        |  |  |    |  |  |    |
| <b>h. Any Birth Defects</b>       | <input style="width: 150px; height: 15px;" type="text"/>                                                                                                                                                                                                                                                                               | <input style="width: 150px; height: 15px;" type="text"/>      | <input style="width: 150px; height: 15px;" type="text"/>      |    |    |  |    |                                                                                                                                                                                                                                                                                                                                        |  |  |    |  |  |    |                                                                                                                                                                                                                                                                                                                                        |  |  |    |  |  |    |

**43. Continued III**

**10th Pregnancy**

**11th Pregnancy**

**12th Pregnancy**

**a. On what date did the pregnancy end?**

M      D      Y  
  /   /

M      D      Y  
  /   /

M      D      Y  
  /   /

**b. How many weeks did the pregnancy last?**

**c. How did the pregnancy end?**

- Live birth
- Still birth
- Miscarriage
- Abortion
- Ectopic pregnancy
- Moles

- Live birth
- Still birth
- Miscarriage
- Abortion
- Ectopic pregnancy
- Moles

- Live birth
- Still birth
- Miscarriage
- Abortion
- Ectopic pregnancy
- Moles

**d. Pregnancy complications?**

- None
- Mild Preeclampsia
- Severe Preeclampsia
- Eclampsia
- Abruptio placentae
- Placenta previa
- Incompetent cervix
- Gestational diabetes
- Intrauterine infection
- Others

- None
- Mild Preeclampsia
- Severe Preeclampsia
- Eclampsia
- Abruptio placentae
- Placenta previa
- Incompetent cervix
- Gestational diabetes
- Intrauterine infection
- Others

- None
- Mild Preeclampsia
- Severe Preeclampsia
- Eclampsia
- Abruptio placentae
- Placenta previa
- Incompetent cervix
- Gestational diabetes
- Intrauterine infection
- Others

**If this was a live birth, complete the following questions**

**E. Sex of the baby**

- Male    Female

- Male    Female

- Male    Female

**f. Type of Delivery**

- Vaginal    C-section

- Vaginal    C-section

- Vaginal    C-section

**g. Birthweight of the baby**

lb   oz

lb   oz

lb   oz

**h. Any Birth Defects**

44. Did you have sexual intercourse during this pregnancy, in the:

a1. 1st trimester?  Yes  No

if yes: a2. use condom?  Yes  No

a3. How often did you have intercourse then?

|  |  |
|--|--|
|  |  |
|--|--|

times/month

b1. 2nd trimester?  Yes  No

if yes: b2. use condom?  Yes  No

b3. How often did you have intercourse then?

|  |  |
|--|--|
|  |  |
|--|--|

times/month

c1. 3rd trimester?  Yes  No

if yes: c2. use condom?  Yes  No

c3. How often did you have intercourse then?

|  |  |
|--|--|
|  |  |
|--|--|

times/month

45. Did you have more than one sexual partner during this pregnancy?  Yes  No

46. FOR DATA ENTRY ONLY

a. Gravidity (total # of pregnancies INCLUDING index case)

|  |  |
|--|--|
|  |  |
|--|--|

b. Parity (# of live births NOT INCLUDING index case)

|  |  |
|--|--|
|  |  |
|--|--|

c. Number of prior perterm births (<37wks)

|  |  |
|--|--|
|  |  |
|--|--|

d. Number of prior LBW births (<2500g)

|  |  |
|--|--|
|  |  |
|--|--|

e. Number of prior stillbirths

|  |  |
|--|--|
|  |  |
|--|--|

f. Number of spontaneous abortions

|  |  |
|--|--|
|  |  |
|--|--|

g. Number of induced abortions

|  |  |
|--|--|
|  |  |
|--|--|

**V. DAILY PHYSICAL ACTIVITY BEFORE AND DURING THE INDEX PREGNANCY**

|                                                                       | 3 mo. pre-pregnancy                                                                                                                                                                                                | 1st trimester                                                                                                                                                                                                      | 2nd trimester                                                                                                                                                                                                      | 3rd trimester                                                                                                                                                                                                      |
|-----------------------------------------------------------------------|--------------------------------------------------------------------------------------------------------------------------------------------------------------------------------------------------------------------|--------------------------------------------------------------------------------------------------------------------------------------------------------------------------------------------------------------------|--------------------------------------------------------------------------------------------------------------------------------------------------------------------------------------------------------------------|--------------------------------------------------------------------------------------------------------------------------------------------------------------------------------------------------------------------|
| <b>47a. Working</b>                                                   | <input type="radio"/> Yes <input type="radio"/> No                                                                                                                                                                 | <input type="radio"/> Yes <input type="radio"/> No                                                                                                                                                                 | <input type="radio"/> Yes <input type="radio"/> No                                                                                                                                                                 | <input type="radio"/> Yes <input type="radio"/> No                                                                                                                                                                 |
| <b>If NO, to ALL of question 47a, skip to 48 (next page)</b>          |                                                                                                                                                                                                                    |                                                                                                                                                                                                                    |                                                                                                                                                                                                                    |                                                                                                                                                                                                                    |
| <b>47b. Industry</b>                                                  | <input type="text"/>                                                                                                                                                                                               | <input type="text"/>                                                                                                                                                                                               | <input type="text"/>                                                                                                                                                                                               | <input type="text"/>                                                                                                                                                                                               |
| <b>47c. Job Title</b>                                                 | <input type="text"/>                                                                                                                                                                                               | <input type="text"/>                                                                                                                                                                                               | <input type="text"/>                                                                                                                                                                                               | <input type="text"/>                                                                                                                                                                                               |
| <b>47d. Duties</b>                                                    | <input type="text"/>                                                                                                                                                                                               | <input type="text"/>                                                                                                                                                                                               | <input type="text"/>                                                                                                                                                                                               | <input type="text"/>                                                                                                                                                                                               |
| <b>47e. Your work schedule</b>                                        | <input type="radio"/> Not working<br><input type="radio"/> Regular day shift<br><input type="radio"/> Regular evening shift<br><input type="radio"/> Regular night shift<br><input type="radio"/> Irregular shifts | <input type="radio"/> Not working<br><input type="radio"/> Regular day shift<br><input type="radio"/> Regular evening shift<br><input type="radio"/> Regular night shift<br><input type="radio"/> Irregular shifts | <input type="radio"/> Not working<br><input type="radio"/> Regular day shift<br><input type="radio"/> Regular evening shift<br><input type="radio"/> Regular night shift<br><input type="radio"/> Irregular shifts | <input type="radio"/> Not working<br><input type="radio"/> Regular day shift<br><input type="radio"/> Regular evening shift<br><input type="radio"/> Regular night shift<br><input type="radio"/> Irregular shifts |
| <b>47f. How many hours did you work each week?</b>                    | <input type="text"/> <input type="text"/>                                                                                                                                                                          | <input type="text"/> <input type="text"/>                                                                                                                                                                          | <input type="text"/> <input type="text"/>                                                                                                                                                                          | <input type="text"/> <input type="text"/>                                                                                                                                                                          |
| <b>47g. How long did it take to get to work? (one-way) in MINUTES</b> | <input type="text"/> <input type="text"/> <input type="text"/>                                                                                                                                                     | <input type="text"/> <input type="text"/> <input type="text"/>                                                                                                                                                     | <input type="text"/> <input type="text"/> <input type="text"/>                                                                                                                                                     | <input type="text"/> <input type="text"/> <input type="text"/>                                                                                                                                                     |
| <b>47h. How physically demanding is your job?</b>                     | <input type="radio"/> Slight<br><input type="radio"/> Moderate<br><input type="radio"/> Very Much                                                                                                                  | <input type="radio"/> Slight<br><input type="radio"/> Moderate<br><input type="radio"/> Very Much                                                                                                                  | <input type="radio"/> Slight<br><input type="radio"/> Moderate<br><input type="radio"/> Very Much                                                                                                                  | <input type="radio"/> Slight<br><input type="radio"/> Moderate<br><input type="radio"/> Very Much                                                                                                                  |
| <b>47i. How much job-related mental stress did you experience?</b>    | <input type="radio"/> Slight<br><input type="radio"/> Moderate<br><input type="radio"/> Very Much                                                                                                                  | <input type="radio"/> Slight<br><input type="radio"/> Moderate<br><input type="radio"/> Very Much                                                                                                                  | <input type="radio"/> Slight<br><input type="radio"/> Moderate<br><input type="radio"/> Very Much                                                                                                                  | <input type="radio"/> Slight<br><input type="radio"/> Moderate<br><input type="radio"/> Very Much                                                                                                                  |



## VI. HOME ENVIRONMENT

48. Did you live outside the U.S. during this(index) pregnancy?  Yes  No

IF YES a. What country(s) did you live in? \_\_\_\_\_

Country Code: \_\_\_\_\_

b. For how long did you live outside the U.S.? \_\_\_\_\_ weeks

c. (Calculate, do not ask) Most of pregnancy was:  Inside U.S.  Outside U.S.

49. IF LIVED MOST OF PREGNANCY IN U.S., ASK:

a. What was the zip code of the place you lived longest? \_\_\_\_\_

b. If don't know zip code: What town was it? \_\_\_\_\_

50. How long have you lived in your current home?

\_\_\_\_\_ years \_\_\_\_\_ months \_\_\_\_\_ days

51. Did you live in a shelter for any part of this pregnancy?  Yes  No

If YES, how long? \_\_\_\_\_ months \_\_\_\_\_ weeks \_\_\_\_\_ days

52. All questions below refer to the home mother lived the longest

52a. # of bedrooms \_\_\_\_\_

52b. # of bathrooms \_\_\_\_\_

52c. # of people who permanently live in your home \_\_\_\_\_

52d. what type of fuel do you use for heating your home?

Oil  Electricity  Gas  Other, specify \_\_\_\_\_

52e. What type of stove did you use for cooking?

Gas  Electric  Other, specify \_\_\_\_\_

52f. Do you have any wall to wall carpet in your home?  Yes  No

if yes, specify location:

Living room  Family room

Dining room  Kitchen

Bedroom  Basement

Bathroom  Hallways

Other

If Other, specify \_\_\_\_\_

Do/did you have any pets at the place you lived at the longest?  Yes  No

52g. Cat  Yes  No

52h. Dog  Yes  No

52i. Fish  Yes  No

52j. Birds  Yes  No

52k. Reptiles  Yes  No

52l. Rabbit  Yes  No

52m. Guinea pig  Yes  No

52n. Other  Yes  No

if Other, specify

52o. Does the house you lived in the longest have any cockroaches?  Yes  No

52p. Does the house you lived in the longest have any mice/rats?  Yes  No

52q. Does the house you lived in the longest have any visible mold, mildew, water damage, leakage or seepage?  Yes  No

52r. Was the place you lived in the longest a farming environment?  Yes  No

## VII. CIGARETTE SMOKING

53. Have you ever smoked cigarettes, cigars, or pipe tobacco, or used chewing tobacco or snuff? (Even once counts)  Yes  No

If NO, skip to question 75 (second-hand smoke) on page 22

54. Have you ever smoked or used tobacco regularly for at least a month?  Yes  No

If NO, skip to question 74 (smoking during pregnancy) on page 21

55. How old were you when you began to smoke or use tobacco regularly?   years

56. Altogether, over your entire life, how long have you smoked or used tobacco regularly?

years   months

57. When you used tobacco regularly, did you use cigarettes, cigars, pipes, chewing tobacco, or snuff?

a. Cigarettes  Yes  No

if yes: When you smoked cigarettes, on average how many cigarettes would you smoke per day?

cigarettes

b. Cigars  Yes  No

if yes: When you smoked cigars, on average how many cigars would you smoke per day?

cigars

c. Pipes  Yes  No

if yes: When you smoked pipes, on average how many pipes would you smoke per day?

|  |  |       |
|--|--|-------|
|  |  | pipes |
|--|--|-------|

d. Chewing tobacco  Yes  No

if yes: When you chewed tobaccos, on average how much would you use per day?

|  |  |       |
|--|--|-------|
|  |  | chaws |
|--|--|-------|

e. Snuff  Yes  No

if yes: When you used snuff, on average how much would you use per day?

|  |  |      |
|--|--|------|
|  |  | dips |
|--|--|------|

58. I would now like to ask you some questions about your (smoking/tobacco use) during the time in your life when you were using tobacco the most heavily. How old were you at that time? (IF OVER A PERIOD OF TIME RECORD AGE AT WHICH BEGAN USING HEAVILY)

|  |  |       |
|--|--|-------|
|  |  | years |
|--|--|-------|

59. During the time when you were (smoking / using tobacco) most heavily, on average, how many \_\_\_\_\_ would you have per day?

a. Cigarettes: 

|  |  |
|--|--|
|  |  |
|--|--|

b. Cigars: 

|  |  |
|--|--|
|  |  |
|--|--|

c. Pipes: 

|  |  |
|--|--|
|  |  |
|--|--|

d. Dips: 

|  |  |
|--|--|
|  |  |
|--|--|

e. Chaws: 

|  |  |
|--|--|
|  |  |
|--|--|

60. During this time when you (smoked / used tobacco) most heavily, how soon after you awoke did you (smoke / used tobacco)?

|  |  |       |  |  |         |
|--|--|-------|--|--|---------|
|  |  | hours |  |  | minutes |
|--|--|-------|--|--|---------|

61. During this time when you (smoked / used tobacco) most heavily, how often would you check to make sure that you had (cigarettes/cigars/tobacco) around to (smoke / use)?

Would you say...  Often  Sometimes  Rarely  Never

62. During this time when you (smoked / used tobacco) most heavily, if you didn't (smoke / use tobacco) for a period of time, how strong would your craving get for another (cigarette / cigar / pipe / dip / chaw)?  Very Strong  Strong  Moderate  Hardly any

63. During this time when you (smoked / used tobacco) most heavily, how difficult was it for you to not (smoke / use) it in places where it was forbidden? Would you say...

Very difficult  Somewhat difficult  A little difficult  Not difficult at all

64. During this time when you (smoked / used tobacco) most heavily, would you (smoke / use tobacco) when you were so ill that you were in bed most of the day?  Yes  No

65. During this time when you (smoked / used tobacco) most heavily, would you (smoke / use tobacco) more during the morning than during the rest of the day?  Yes  No

66. During this time when you (smoked / used tobacco) most heavily, which (cigarette / cigar / pipe / dip / chew) of the day would be the most satisfying? Was it the first?

First  Other  Not sure

67. IF SMOKED IN HEAVIEST USE PERIOD: During the time when you smoked most heavily, how often did you inhale? Would you say:  Always  Sometimes  Never

68a. IF ALWAYS OR SOMETIMES: How often did you inhale deep into your lungs? Would you say:  Always  Sometimes  Never

68. Have you ever seriously attempted to stop (smoking / using tobacco)?  Yes  No

If NO, skip to question 74 (smoking during pregnancy) on page 21

69. How many times in you life have you seriously tried to stop (smoking / using tobacco)?

times

70. How depressed did you get when you tried to quit (smoking / using tobacco)?

Very  Somewhat  A little  Hardly at all

72. How nervous, jittery, or irritable did you get when you tried to quit (smoking / using tobacco)?

Very  Somewhat  A little  Hardly at all

71. Have you ever gone to a professional to help you stop (smoking / using tobacco)?  Yes  No

IF YES: Whom did you see? (circle all that apply)

- a. Regular doctor
- b. Mental health professional
- c. Stop smoking clinic / workshop
- d. Hypnotist
- e. Other

if other, specify

73. Have you ever used nicotine gum or patches to help you stop (smoking / using tobacco)?

Yes  No

74. I'd like to ask you some questions about your (smoking / tobacco use) before you found out you were pregnant.

a. In the six months before you found out you were pregnant, did you (smoke / use tobacco)?

Yes  No

If yes, On average, how many \_\_\_\_\_ did you have per day?

a. Cigarettes:

b. Cigars:

c. Pipes:

d. Dips:

e. Chaws:

b. In the first three months of your pregnancy, did you (smoke / use tobacco)?  Yes  No

If yes, On average, how many \_\_\_\_\_ did you have per day?

a. Cigarettes:

b. Cigars:

c. Pipes:

d. Dips:

e. Chaws:

c. In the middle three months of your pregnancy, did you (smoke / use tobacco)?  Yes  No

If yes, On average, how many \_\_\_\_\_ did you have per day?

a. Cigarettes:

b. Cigars:

c. Pipes:

d. Dips:

e. Chaws:

d. In the last three months of your pregnancy, did you (smoke / use tobacco)?  Yes  No

If yes, On average, how many \_\_\_\_\_ did you have per day?

a. Cigarettes:

b. Cigars:

c. Pipes:

d. Dips:

e. Chaws:

75. How many people who live in your home smoke cigarettes (NOT counting yourself)?

76. How many of them smoke inside the home?

77. Total numbers of cigarettes smoked inside your home per day (NOT including amount subject smoked)

cigs/day

### VIII. ALCOHOL AND DRUG USE

I'd like to ask you some questions about alcohol and drinking

78. In the six months before you found out you were pregnant, how often did you drink?

- Never  Occasionally (special occasions / holidays)  Regularly

If Regularly:

a. How many drinks did you have in a typical week?

b. What type of drinks were they? (NUMBER OF EACH)

beers or wine coolers

glasses of wine

shots of liquor

mixed drinks

IF MIXED DRINKS: How much alcohol was in each drink?

79. In the first three months of your pregnancy, how often did you drink?

- Never  Occasionally (special occasions / holidays)  Regularly

If Regularly:

a. How many drinks did you have in a typical week?

b. What type of drinks were they? (NUMBER OF EACH)

beers or wine coolers

glasses of wine

shots of liquor

mixed drinks

IF MIXED DRINKS: How much alcohol was in each drink?

**80. In the middle three months of your pregnancy, how often did you drink?**

Never  Occasionally (special occasions / holidays)  Regularly

If Regularly:

a. How many drinks did you have in a typical week?

b. What type of drinks were they? (NUMBER OF EACH)

 

beers or wine coolers

 

glasses of wine

 

shots of liquor

 

mixed drinks

IF MIXED DRINKS: How much alcohol was in each drink?

**81. In the last three months of your pregnancy, how often did you drink?**

Never  Occasionally (special occasions / holidays)  Regularly

If Regularly:

a. How many drinks did you have in a typical week?

b. What type of drinks were they? (NUMBER OF EACH)

 

beers or wine coolers

 

glasses of wine

 

shots of liquor

 

mixed drinks

IF MIXED DRINKS: How much alcohol was in each drink?

**82. Now I'd like to ask you some questions about drug use. Have you ever used..(read each one)**

a. Marijuana  Yes  No

b. Heroin  Yes  No If yes, have you ever been on methadone treatment?  Yes  No

c. Cocaine  Yes  No

d. Crack  Yes  No

e. Speed/Amphetamines  Yes  No

f. Paint/Glue inhalant  Yes  No

g. PCP  Yes  No

h. Barbituates  Yes  No

i. Benzo's/Valium  Yes  No

j. Ecstasy  Yes  No

k. LSD/Hallucinogens  Yes  No

l. Oxycodone  Yes  No

m. Other  Yes  No specify:

83. If used any drug WITHIN 6 months pre-pregnancy and during CURRENT (index) pregnancy, fill out chart BELOW:

CODE: 1=occasional; 2=regular ; If regular, write in amount X/wk

| Drugs             | 6 mo pre-pregnancy                                                                                | 1st trimester                                                                                     | 2nd trimester                                                                                     | 3rd trimester                                                                                     |
|-------------------|---------------------------------------------------------------------------------------------------|---------------------------------------------------------------------------------------------------|---------------------------------------------------------------------------------------------------|---------------------------------------------------------------------------------------------------|
| Marijuana         | <input type="radio"/> 1 <input type="radio"/> 2<br><input type="text"/> <input type="text"/> X/WK | <input type="radio"/> 1 <input type="radio"/> 2<br><input type="text"/> <input type="text"/> X/WK | <input type="radio"/> 1 <input type="radio"/> 2<br><input type="text"/> <input type="text"/> X/WK | <input type="radio"/> 1 <input type="radio"/> 2<br><input type="text"/> <input type="text"/> X/WK |
| Heroin            | <input type="radio"/> 1 <input type="radio"/> 2<br><input type="text"/> <input type="text"/> X/WK | <input type="radio"/> 1 <input type="radio"/> 2<br><input type="text"/> <input type="text"/> X/WK | <input type="radio"/> 1 <input type="radio"/> 2<br><input type="text"/> <input type="text"/> X/WK | <input type="radio"/> 1 <input type="radio"/> 2<br><input type="text"/> <input type="text"/> X/WK |
| Methadone         | <input type="radio"/> 1 <input type="radio"/> 2<br><input type="text"/> <input type="text"/> X/WK | <input type="radio"/> 1 <input type="radio"/> 2<br><input type="text"/> <input type="text"/> X/WK | <input type="radio"/> 1 <input type="radio"/> 2<br><input type="text"/> <input type="text"/> X/WK | <input type="radio"/> 1 <input type="radio"/> 2<br><input type="text"/> <input type="text"/> X/WK |
| Cocaine           | <input type="radio"/> 1 <input type="radio"/> 2<br><input type="text"/> <input type="text"/> X/WK | <input type="radio"/> 1 <input type="radio"/> 2<br><input type="text"/> <input type="text"/> X/WK | <input type="radio"/> 1 <input type="radio"/> 2<br><input type="text"/> <input type="text"/> X/WK | <input type="radio"/> 1 <input type="radio"/> 2<br><input type="text"/> <input type="text"/> X/WK |
| Crack             | <input type="radio"/> 1 <input type="radio"/> 2<br><input type="text"/> <input type="text"/> X/WK | <input type="radio"/> 1 <input type="radio"/> 2<br><input type="text"/> <input type="text"/> X/WK | <input type="radio"/> 1 <input type="radio"/> 2<br><input type="text"/> <input type="text"/> X/WK | <input type="radio"/> 1 <input type="radio"/> 2<br><input type="text"/> <input type="text"/> X/WK |
| Speed/Amphetamine | <input type="radio"/> 1 <input type="radio"/> 2<br><input type="text"/> <input type="text"/> X/WK | <input type="radio"/> 1 <input type="radio"/> 2<br><input type="text"/> <input type="text"/> X/WK | <input type="radio"/> 1 <input type="radio"/> 2<br><input type="text"/> <input type="text"/> X/WK | <input type="radio"/> 1 <input type="radio"/> 2<br><input type="text"/> <input type="text"/> X/WK |
| Paint/Glue        | <input type="radio"/> 1 <input type="radio"/> 2<br><input type="text"/> <input type="text"/> X/WK | <input type="radio"/> 1 <input type="radio"/> 2<br><input type="text"/> <input type="text"/> X/WK | <input type="radio"/> 1 <input type="radio"/> 2<br><input type="text"/> <input type="text"/> X/WK | <input type="radio"/> 1 <input type="radio"/> 2<br><input type="text"/> <input type="text"/> X/WK |
| PCP               | <input type="radio"/> 1 <input type="radio"/> 2<br><input type="text"/> <input type="text"/> X/WK | <input type="radio"/> 1 <input type="radio"/> 2<br><input type="text"/> <input type="text"/> X/WK | <input type="radio"/> 1 <input type="radio"/> 2<br><input type="text"/> <input type="text"/> X/WK | <input type="radio"/> 1 <input type="radio"/> 2<br><input type="text"/> <input type="text"/> X/WK |



|                              |                                                                                                   |                                                                                                   |                                                                                                   |                                                                                                   |
|------------------------------|---------------------------------------------------------------------------------------------------|---------------------------------------------------------------------------------------------------|---------------------------------------------------------------------------------------------------|---------------------------------------------------------------------------------------------------|
| <b>Barbituates</b>           | <input type="radio"/> 1 <input type="radio"/> 2<br><input type="text"/> <input type="text"/> X/WK | <input type="radio"/> 1 <input type="radio"/> 2<br><input type="text"/> <input type="text"/> X/WK | <input type="radio"/> 1 <input type="radio"/> 2<br><input type="text"/> <input type="text"/> X/WK | <input type="radio"/> 1 <input type="radio"/> 2<br><input type="text"/> <input type="text"/> X/WK |
| <b>Benzo's/<br/>Valium</b>   | <input type="radio"/> 1 <input type="radio"/> 2<br><input type="text"/> <input type="text"/> X/WK | <input type="radio"/> 1 <input type="radio"/> 2<br><input type="text"/> <input type="text"/> X/WK | <input type="radio"/> 1 <input type="radio"/> 2<br><input type="text"/> <input type="text"/> X/WK | <input type="radio"/> 1 <input type="radio"/> 2<br><input type="text"/> <input type="text"/> X/WK |
| <b>Ecstasy</b>               | <input type="radio"/> 1 <input type="radio"/> 2<br><input type="text"/> <input type="text"/> X/WK | <input type="radio"/> 1 <input type="radio"/> 2<br><input type="text"/> <input type="text"/> X/WK | <input type="radio"/> 1 <input type="radio"/> 2<br><input type="text"/> <input type="text"/> X/WK | <input type="radio"/> 1 <input type="radio"/> 2<br><input type="text"/> <input type="text"/> X/WK |
| <b>LSD/Hallu<br/>cinogen</b> | <input type="radio"/> 1 <input type="radio"/> 2<br><input type="text"/> <input type="text"/> X/WK | <input type="radio"/> 1 <input type="radio"/> 2<br><input type="text"/> <input type="text"/> X/WK | <input type="radio"/> 1 <input type="radio"/> 2<br><input type="text"/> <input type="text"/> X/WK | <input type="radio"/> 1 <input type="radio"/> 2<br><input type="text"/> <input type="text"/> X/WK |
| <b>Other</b>                 | <input type="radio"/> 1 <input type="radio"/> 2<br><input type="text"/> <input type="text"/> X/WK | <input type="radio"/> 1 <input type="radio"/> 2<br><input type="text"/> <input type="text"/> X/WK | <input type="radio"/> 1 <input type="radio"/> 2<br><input type="text"/> <input type="text"/> X/WK | <input type="radio"/> 1 <input type="radio"/> 2<br><input type="text"/> <input type="text"/> X/WK |

If other, please specify drug:

**IX. GENERAL INFORMATION**

84. How much did you weigh when you were born?

lbs   oz      OR          grams

85. Were you born prematurely?  Yes    No

85a. If yes, at what gestation?   weeks

86. What is the highest grade of school you have completed?

- |                                                     |                                                                    |
|-----------------------------------------------------|--------------------------------------------------------------------|
| <input type="radio"/> No school / Elementary school | <input type="radio"/> Some secondary school ( 9th grade and above) |
| <input type="radio"/> High school graduate or GED   | <input type="radio"/> Some college                                 |
| <input type="radio"/> College degree and above      |                                                                    |

**87. Which one of these groups best describes your racial background?**

- Black / African American    White    Hispanic  
 Asian    Haitian    Cape Verdian  
 Pacific Islander    Other    Unknown

**88. Where were you born?**  U.S.    Foreign country(specify)    Unknown

Other Country:  Country Code :

**88a. If FOREIGN BORN: How long have you lived in the U.S.?**

years    months    days

**89. Where was your mother born?**  U.S.    Foreign country(specify)    Unknown

Other Country:  Country Code :

**90. Where was your father born?**  U.S.    Foreign country(specify)    Unknown

Other Country:  Country Code :

**91. What is your native language?**

- English    Spanish    Haitian Creole    French    Portuguese    Other

**91a. If not English: How would you rate your ability to speak English?**

- Very well    Well    Not very well    Not at all

**92. Will you answer some questions about your child's biological father?**  Yes    No

If NO, skip to question 96 on next page

**93. What is the highest grade of school the baby's father has completed?**

- No school / Elementary school    Some secondary school ( 9th grade and above)  
 High school graduate or GED    Some college  
 College degree and above    Unknown

**94. Which one of these groups best describes the racial background of the baby's father?**

- Black / African American    White    Hispanic  
 Asian    Haitian    Cape Verdian  
 Pacific Islander    Other    Unknown

**95. Where was the baby's father born?**  U.S.    Foreign country(specify)    Unknown

Other Country:  Country Code :

**96. What is your present marital status?**

Married  Widowed  Divorced  Separated  Single

**97. What was your total household income last year, before taxes? (Includes public assistance)**

<\$5,000  \$5000 - 9,999  \$10,000 - 14,999  \$15,000 - 19,999  
 \$20,000 - 24,999  \$25,000 - 29,999  \$30,000 - 34,999  \$35,000 - 39,999  
 \$40,000 - 49,999  \$50,000 - 59,999  \$60,000 and over  Don't know

**97a. Please ask if mother does not know annual income only:**

What is your weekly income? \$

|  |  |  |  |
|--|--|--|--|
|  |  |  |  |
|--|--|--|--|

**98. Are you getting:**

- a. WIC?  Yes  No      b. Food Stamps?  Yes  No  
c. AFDC? (Aid to families with dependent children)  Yes  No  
d. Housing assistance?  Yes  No      e. Fuel assistance?  Yes  No  
f. Any other public assistance?  Yes  No

if other, specify

|  |
|--|
|  |
|--|

**X. DIETARY HISTORY****99. Did you take prenatal vitamins prescribed by your doctor?  Yes  No**

(prepregnancy -- 6 month prior to conception)

- a. Prepregnancy  No  <1x/wk  1-2x/wk  3-5x/wk  Almost daily  
b. 1st trimester  No  <1x/wk  1-2x/wk  3-5x/wk  Almost daily  
c. 2nd trimester  No  <1x/wk  1-2x/wk  3-5x/wk  Almost daily  
d. 3rd trimester  No  <1x/wk  1-2x/wk  3-5x/wk  Almost daily

**100. Did you take iron?  Yes  No**

(prepregnancy -- 6 month prior to conception)

- a. Prepregnancy  No  <1x/wk  1-2x/wk  3-5x/wk  Almost daily  
b. 1st trimester  No  <1x/wk  1-2x/wk  3-5x/wk  Almost daily  
c. 2nd trimester  No  <1x/wk  1-2x/wk  3-5x/wk  Almost daily  
d. 3rd trimester  No  <1x/wk  1-2x/wk  3-5x/wk  Almost daily

**101. Did you take any over the counter vitamins?  Yes  No**

(prepregnancy -- 6 month prior to conception)

- a. Prepregnancy  No  <1x/wk  1-2x/wk  3-5x/wk  Almost daily  
b. 1st trimester  No  <1x/wk  1-2x/wk  3-5x/wk  Almost daily  
c. 2nd trimester  No  <1x/wk  1-2x/wk  3-5x/wk  Almost daily  
d. 3rd trimester  No  <1x/wk  1-2x/wk  3-5x/wk  Almost daily

Name of Vitamin:

|  |
|--|
|  |
|--|

102. Did you take any herbal supplements?  Yes  No

(pregnancy -- 6 month prior to conception)

- a. **Prepregnancy**  No  <1x/wk  1-2x/wk  3-5x/wk  Almost daily
- b. **1st trimester**  No  <1x/wk  1-2x/wk  3-5x/wk  Almost daily
- c. **2nd trimester**  No  <1x/wk  1-2x/wk  3-5x/wk  Almost daily
- d. **3rd trimester**  No  <1x/wk  1-2x/wk  3-5x/wk  Almost daily

Name of herbal supplement:

Name of herbal supplement:

Name of herbal supplement:

103. During this pregnancy, on average, how often do you eat or drink following foods per week?

- a. **Green vegetables**  None  <1 days  1-2 days  3-5 days  6-7 days  don't know
- b. **Orange Veggies (Carrots ,Squash, etc)**  
 None  <1 days  1-2 days  3-5 days  6-7 days  don't know
- c. **Fruits**  None  <1 days  1-2 days  3-5 days  6-7 days  don't know
- d. **Meats**  None  <1 days  1-2 days  3-5 days  6-7 days  don't know
- e. **Shellfish**  None  <1 days  1-2 days  3-5 days  6-7 days  don't know
- f. **Fish**  None  <1 days  1-2 days  3-5 days  6-7 days  don't know
- g. **Eggs**  None  <1 days  1-2 days  3-5 days  6-7 days  don't know
- h. **Cow's Milk / Dairy Products / Cheese**  
 None  <1 days  1-2 days  3-5 days  6-7 days  don't know
- i. **Beans**  None  <1 days  1-2 days  3-5 days  6-7 days  don't know
- j. **Rice**  None  <1 days  1-2 days  3-5 days  6-7 days  don't know
- k. **Wheat (Pasta, Bread, Cereal)**  
 None  <1 days  1-2 days  3-5 days  6-7 days  don't know
- l. **Soy / Tofu**  None  <1 days  1-2 days  3-5 days  6-7 days  don't know
- m. **Seeds (Sesame, Sunflower, Pumpkin)**  
 None  <1 days  1-2 days  3-5 days  6-7 days  don't know
- n. **Calcium Fortified Juice**  None  <1 days  1-2 days  3-5 days  6-7 days  don't know
- o. **Peanut**  None  <1 days  1-2 days  3-5 days  6-7 days  don't know
- p. **Tree nuts**  None  <1 days  1-2 days  3-5 days  6-7 days  don't know

104. Did you drink coffee before or during the index pregnancy?  Yes  No

If yes, was it regular or decaffeinated?  Regular  Decaffeinated  Both

How much did you drink?

|                  | Regular                                                                | Decaf                                                                  |
|------------------|------------------------------------------------------------------------|------------------------------------------------------------------------|
| 1. Prepregnancy  | <input type="text"/> <input type="text"/> <input type="text"/> cups/wk | <input type="text"/> <input type="text"/> <input type="text"/> cups/wk |
| 2. 1st trimester | <input type="text"/> <input type="text"/> <input type="text"/> cups/wk | <input type="text"/> <input type="text"/> <input type="text"/> cups/wk |
| 3. 2nd trimester | <input type="text"/> <input type="text"/> <input type="text"/> cups/wk | <input type="text"/> <input type="text"/> <input type="text"/> cups/wk |
| 4. 3rd trimester | <input type="text"/> <input type="text"/> <input type="text"/> cups/wk | <input type="text"/> <input type="text"/> <input type="text"/> cups/wk |

105. Did you drink tea before or during the index pregnancy?  Yes  No

If yes, was it regular tea or herbal tea?  Regular  Herbal  Both

How much did you drink?

|                  | Regular                                                                | Herbal                                                                 |
|------------------|------------------------------------------------------------------------|------------------------------------------------------------------------|
| 1. Prepregnancy  | <input type="text"/> <input type="text"/> <input type="text"/> cups/wk | <input type="text"/> <input type="text"/> <input type="text"/> cups/wk |
| 2. 1st trimester | <input type="text"/> <input type="text"/> <input type="text"/> cups/wk | <input type="text"/> <input type="text"/> <input type="text"/> cups/wk |
| 3. 2nd trimester | <input type="text"/> <input type="text"/> <input type="text"/> cups/wk | <input type="text"/> <input type="text"/> <input type="text"/> cups/wk |
| 4. 3rd trimester | <input type="text"/> <input type="text"/> <input type="text"/> cups/wk | <input type="text"/> <input type="text"/> <input type="text"/> cups/wk |

106. Did you drink soft drinks during the index pregnancy?  Yes  No

If yes, what kinds?  Caffeinated  Decaf  Both

(If Coke, Pepsi, and/or Mountain Dew) How much (Coke/Pepsi/Mountain Dew) did you drink?

|                  |                                                                        |
|------------------|------------------------------------------------------------------------|
| 1. Prepregnancy  | <input type="text"/> <input type="text"/> <input type="text"/> cups/wk |
| 2. 1st trimester | <input type="text"/> <input type="text"/> <input type="text"/> cups/wk |
| 3. 2nd trimester | <input type="text"/> <input type="text"/> <input type="text"/> cups/wk |
| 4. 3rd trimester | <input type="text"/> <input type="text"/> <input type="text"/> cups/wk |

**107. Do you plan to feed you baby :**

Breast Feed Only    Formula Feed Only    Both Breast Feed and Formula Feed    Don't know yet

**XI. MEDICAL HISTORY****108. What medicines did you take during your pregnancy excluding vitamins?**

a. Medication name:

Used in: 1st trimester:  Yes    No    Unsure

2nd trimester:  Yes    No    Unsure

3rd trimester:  Yes    No    Unsure

b. Medication name:

Used in: 1st trimester:  Yes    No    Unsure

2nd trimester:  Yes    No    Unsure

3rd trimester:  Yes    No    Unsure

c. Medication name:

Used in: 1st trimester:  Yes    No    Unsure

2nd trimester:  Yes    No    Unsure

3rd trimester:  Yes    No    Unsure

d. Medication name:

Used in: 1st trimester:  Yes    No    Unsure

2nd trimester:  Yes    No    Unsure

3rd trimester:  Yes    No    Unsure

e. Medication name:

Used in: 1st trimester:  Yes    No    Unsure

2nd trimester:  Yes    No    Unsure

3rd trimester:  Yes    No    Unsure
